# Supplementary material
Source: PubMed Central journal article supplement (PMC4198026)
Supplement: embj0033-1227-sd1.pdf [file embj0033-1227-sd1.pdf]

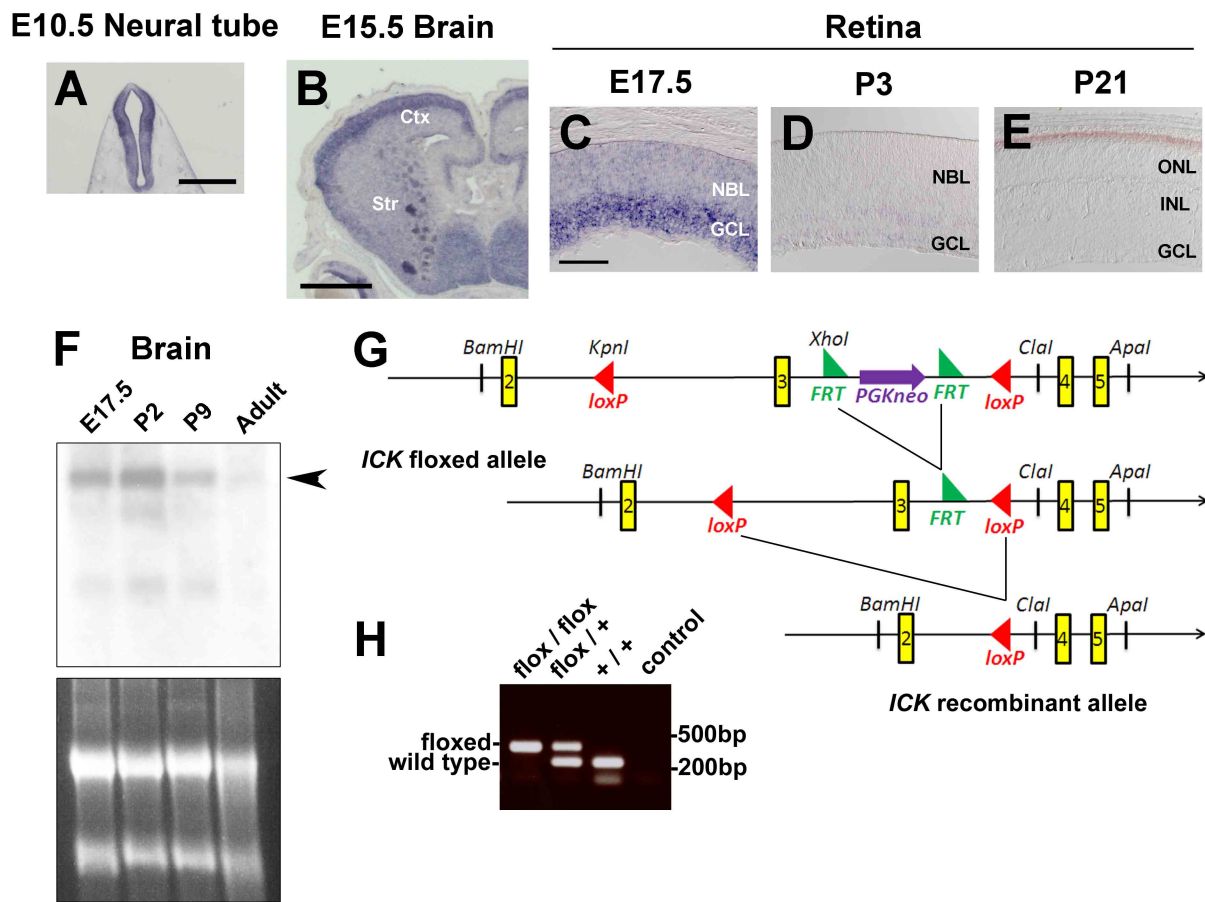

Chaya *et al.*, Figure S1

**Figure S1** Expression of *ICK* and generation of *ICK* floxed mouse line. (A–E) *In situ* hybridization analysis of mouse *ICK* in the developing neural tube, brain, and retina. The *ICK* signal was detected in the E10.5 neural tube (A) and E15.5 brain (B). The *ICK* signal was detected in the developing retina at E17.5, but was not detected at later stages (C–E). (F) Northern blot analysis of mouse *ICK* in the developing and adult brain. The arrowhead indicates the approximately 6.6-kb *ICK* full-length mRNA. The lower panel shows ethidium bromide staining of the RNA. (G) Diagram of the targeting vector, *ICK* flox allele, and *ICK* CKO allele. The yellow boxes, green arrowheads, and red arrowheads indicate exons, *FRT* sites, and *loxP* sites, respectively. Removal of the floxed region by Cre-mediated recombination is predicted to result in a translational frame shift and complete loss of *ICK* function. (H) PCR products of approximately 250 or 400 bp were amplified from the wild-type or targeted allele, respectively. Scale bars, 1 mm (B), 500  $\mu$ m (A), and 100  $\mu$ m (C–E). Ctx, cerebral cortex; Str, striatum; NBL, neuroblastic layer; GCL, ganglion cell layer; ONL, outer nuclear layer; INL, inner nuclear layer.
