# Supplementary material
Source: PubMed Central journal article supplement (PMC4198026)
Supplement: embj0033-1227-sd5.pdf [file embj0033-1227-sd5.pdf]

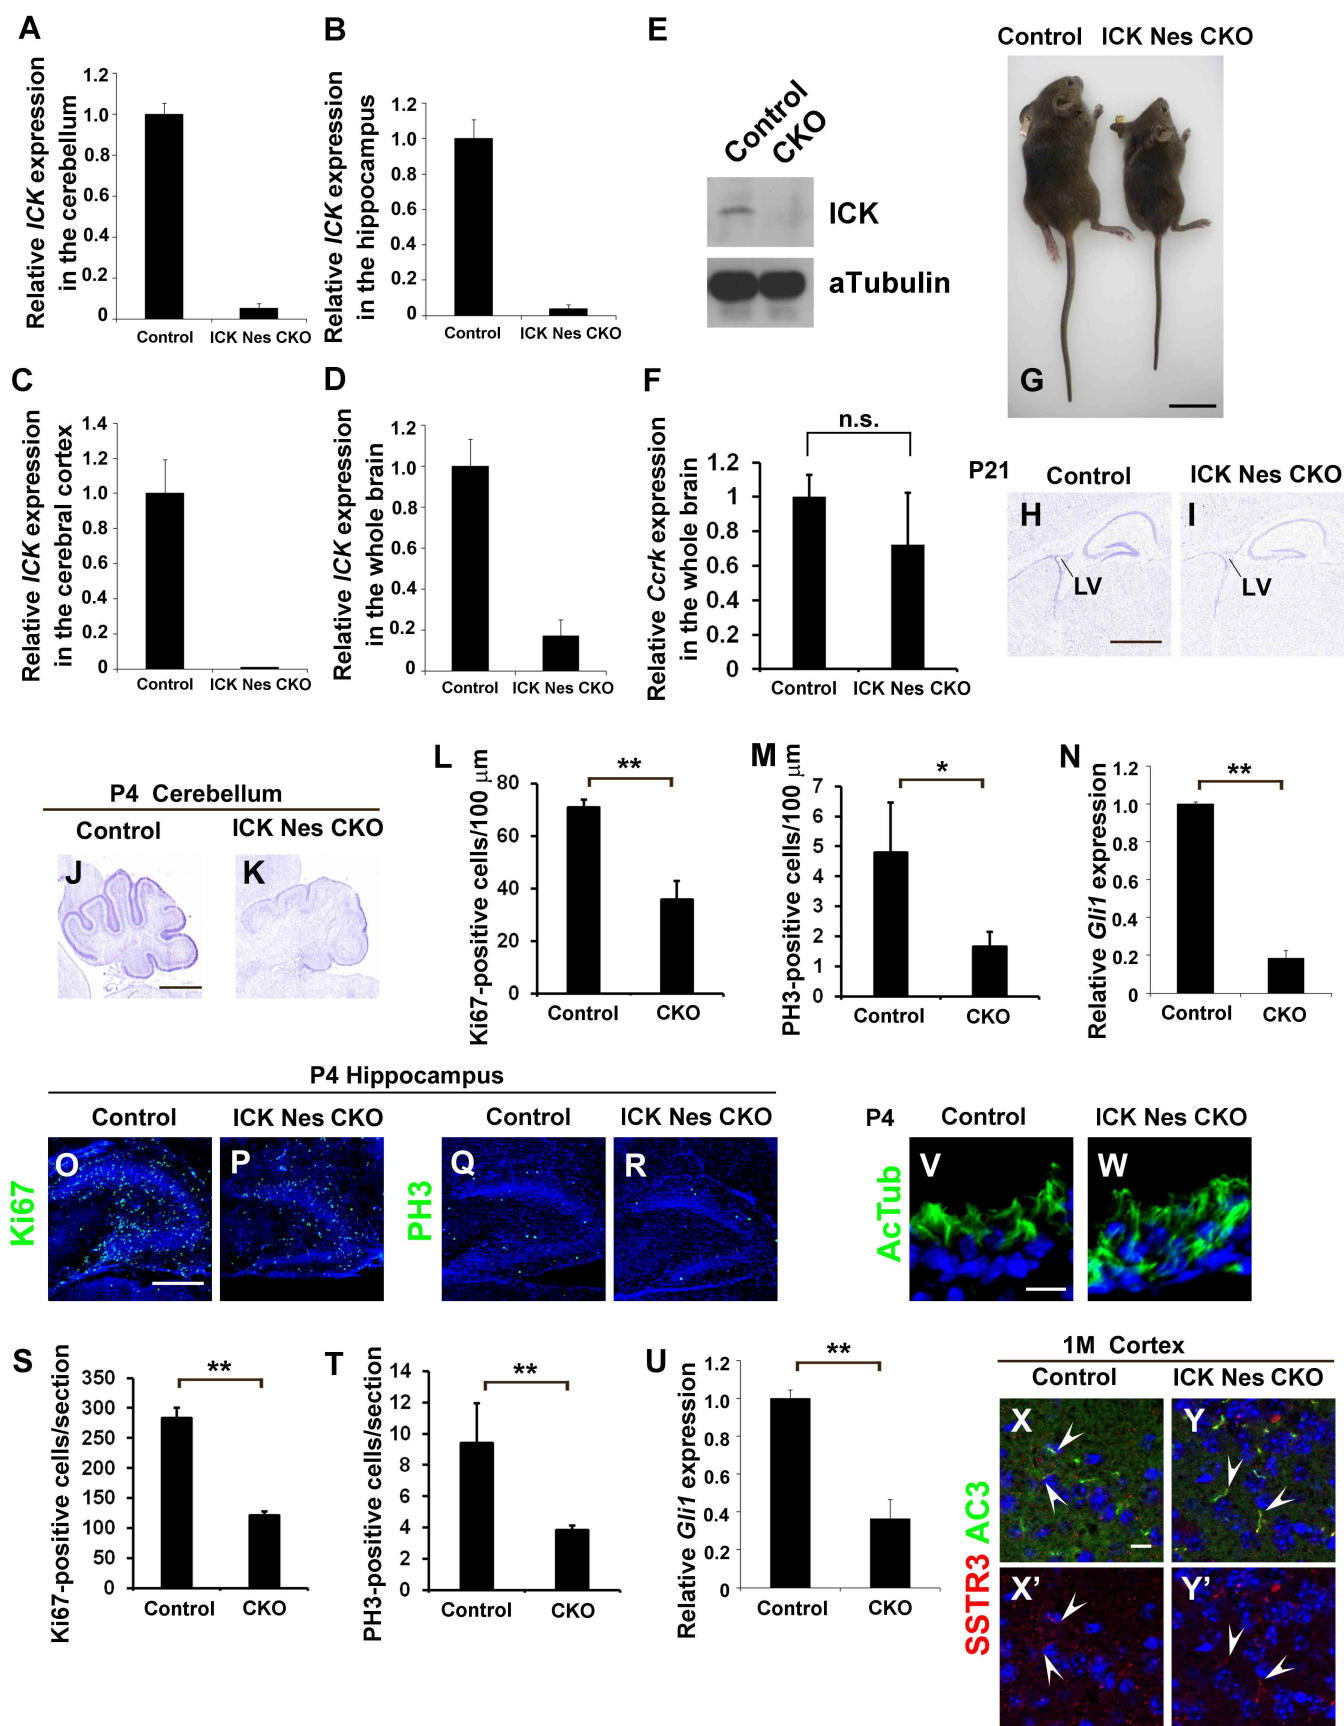

Chaya *et al.*, Figure S5

**Figure S5** Phenotypic analysis of *ICK Nes* CKO mice. (A–D) *ICK* mRNA expression levels in the P4 control and *ICK Nes* CKO cerebellum (A), in the P4 control and *ICK Nes* CKO hippocampus (B), in the P4 control and *ICK Nes* CKO cerebral cortex (C), and in the P4 control and *ICK Nes* CKO whole brain (D) were analyzed by Q-PCR. Error bars show the SD. (E) *ICK* protein expression in the P4 control and *ICK Nes* CKO brain was examined by Western blot analysis.  $\alpha$ -tubulin was used as a loading control. (F) *Ccrk* mRNA expression levels in the P4 control and *ICK Nes* CKO brain were analyzed by Q-PCR. There was no significant difference between the P4 control and *ICK Nes* CKO brain. (G) Growth retardation observed in *ICK Nes* CKO mice (right) compared to control mice (left) at the age of one month. (H, I) Nissl staining of sagittal sections from the P21 control (H) and *ICK Nes* CKO (I) brain. There was no obvious difference in the size of lateral ventricles between the control and *ICK Nes* CKO mice.

Sections from cerebral cortex were stained with ciliary GPCR, SSTR3 (red). The cilia were stained with an anti-AC3 antibody (green). SSTR3 (arrowheads) were localized in the cilia properly both in control and *ICK Nes* CKO mice. Nuclei were stained with DAPI (blue). Scale bars, 20 mm (**G**), 1mm (**H**, **I**), 500  $\mu$ m (**J**, **K**), 200  $\mu$ m (**O–R**) and 10  $\mu$ m (**V–Y'**). Error bars show the SD.  $**p < 0.03$ ,  $*p < 0.05$ , n.s., not significant. LV, lateral ventricle.
