# Supplementary material
Source: PubMed Central journal article supplement (PMC4198026)
Supplement: embj0033-1227-sd7.pdf [file embj0033-1227-sd7.pdf]

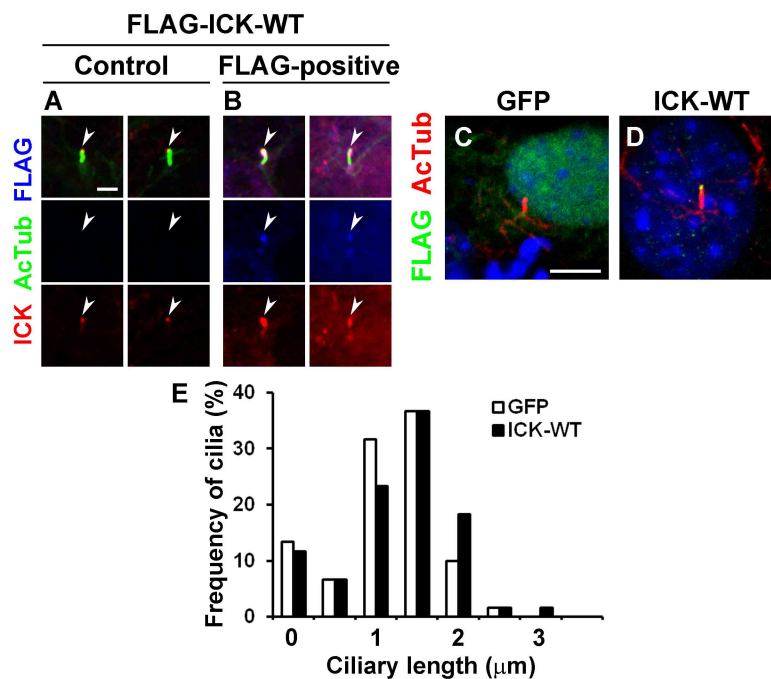

**Chaya et al., Figure S7**

**Figure S7** Characterization of cilia in ICK-overexpressing cells. (A, B) The FLAG-tagged construct expressing ICK-WT was transfected into NIH3T3 cells. Cells were stained with anti-ICK (red), anti-acetylated  $\alpha$ -tubulin (green), and anti-FLAG (blue) antibodies. ICK signals at ciliary tips increased in FLAG-positive cells. (C–E) Overexpression of ICK induced slight ciliary elongation. FLAG-tagged constructs expressing GFP (C) or ICK-WT (D) were transfected into NIH3T3 cells.

Cells were stained with anti-FLAG (green) and anti-acetylated  $\alpha$ -tubulin (red) antibodies. **(E)** The length of cilia stained with anti-acetylated  $\alpha$ -tubulin antibody was measured. Arrowheads indicate ciliary tips. Nuclei were stained with DAPI (blue). Scale bars, 5  $\mu\text{m}$  **(C, D)** and 2  $\mu\text{m}$  **(A, B)**
